# Supplementary material
Source: PubMed Central journal article supplement (PMC8178206)
Supplement: NIHMS1685507-supplement-2.pdf [file NIHMS1685507-supplement-2.pdf]

## Supplementary Table 1

Sources of the cell lines

| Cell line      | Source                    | Location                        | comments                                            |
|----------------|---------------------------|---------------------------------|-----------------------------------------------------|
| MCF10A         | ATCC                      | Manassas, Virginia              | authenticated June 2019; Genetica Cell Line testing |
| HMEC-B1400is16 | gift of Paul Yaswen       | Lawrence Berkeley National Labs |                                                     |
| HMEC-N85isRb3  | gift of Paul Yaswen       | Lawrence Berkeley National Labs |                                                     |
| HMEC-B1389is16 | gift of Paul Yaswen       | Lawrence Berkeley National Labs |                                                     |
| HaCaT          | gift of Paul Yaswen       | Lawrence Berkeley National Labs |                                                     |
| MCF12A         | gift of Paul Yaswen       | Lawrence Berkeley National Labs |                                                     |
| MDA-231        | ATCC                      | Manassas, Virginia              |                                                     |
| MDA-MB-468     | ATCC                      | Manassas, Virginia              | authenticated June 2019; Genetica Cell Line testing |
| HCC1954        | ATCC                      | Manassas, Virginia              |                                                     |
| PC3            | ATCC                      | Manassas, Virginia              |                                                     |
| BxPC3          | gift of Michael Korn      | UCSF                            |                                                     |
| T24            | ATCC                      | Manassas, Virginia              |                                                     |
| HCT116         | gift of Michael Korn      | UCSF                            |                                                     |
| HT29           | ATCC                      | Manassas, Virginia              | within 6 months of purchase                         |
| Colo205        | ATCC                      | Manassas, Virginia              |                                                     |
| DLD1           | gift of Michael Korn      | UCSF                            |                                                     |
| RKO            | gift of Michael Korn      | UCSF                            |                                                     |
| AGS            | ATCC                      | Manassas, Virginia              | within 6 months of purchase                         |
| KatoIII        | ATCC                      | Manassas, Virginia              | within 6 months of purchase                         |
| SNU-5          | ATCC                      | Manassas, Virginia              | within 6 months of purchase                         |
| SNU-16         | ATCC                      | Manassas, Virginia              | within 6 months of purchase                         |
| MKN7           | JCRB Cell Bank            | Osaka, Japan                    | within 6 months of purchase                         |
| TE-7           | gift of Michael Korn      | UCSF                            |                                                     |
| OE-21          | gift of Michael Korn      | UCSF                            |                                                     |
| BIC-1          | gift of Michael Korn      | UCSF                            |                                                     |
| SEG-1          | gift of Michael Korn      | UCSF                            |                                                     |
| TE-4           | Riken BRC                 | Ibaraki, Japan                  | within 6 months of purchase                         |
| OE-33          | gift of Michael Korn      | UCSF                            |                                                     |
| KYSE-410       | SigmaAldrich              | St. Louis, MO                   | within 6 months of purchase                         |
| H460           | gift of David Jablons     | UCSF                            |                                                     |
| H1703          | gift of David Jablons     | UCSF                            |                                                     |
| H838           | gift of David Jablons     | UCSF                            |                                                     |
| VMRCLCP        | JCRB Cell Bank            | Osaka, Japan                    | within 6 months of purchase                         |
| H2170          | ATCC                      | Manassas, Virginia              | within 6 months of purchase                         |
| Calu3          | gift of Trever Bivona     | UCSF                            |                                                     |
| Cal27          | ATCC                      | Manassas, Virginia              | within 6 months of purchase                         |
| BICR-16        | SigmaAldrich              | St. Louis, MO                   | within 6 months of purchase                         |
| TEN            | Riken BRC, Ibaraki, Japan |                                 | within 6 months of purchase                         |
| USPC-ARK1      | gift of Allesandro Santin | Yale                            |                                                     |
| USPC-ARK2      | gift of Allesandro Santin | Yale                            |                                                     |
| USPC-ARK7      | gift of Allesandro Santin | Yale                            |                                                     |
| Hec1A          | gift of Linda Guidice     | UCSF                            |                                                     |
| SYF            | ATCC                      | Manassas, Virginia              |                                                     |

ATCC = American Type Culture Collection

JCRB = Japanese Collection of Research Bioresources

Riken BRC = Riken Bioresource Center
